# Supplementary material for: The R2R3-MYB Transcriptional Repressor TgMYB4 Negatively Regulates Anthocyanin Biosynthesis in Tulips (Tulipa gesneriana L.)
Source: MDPI journal article supplement (doi:10.3390/ijms25010563), 2024-01-01
Supplement: s1 [file s1]

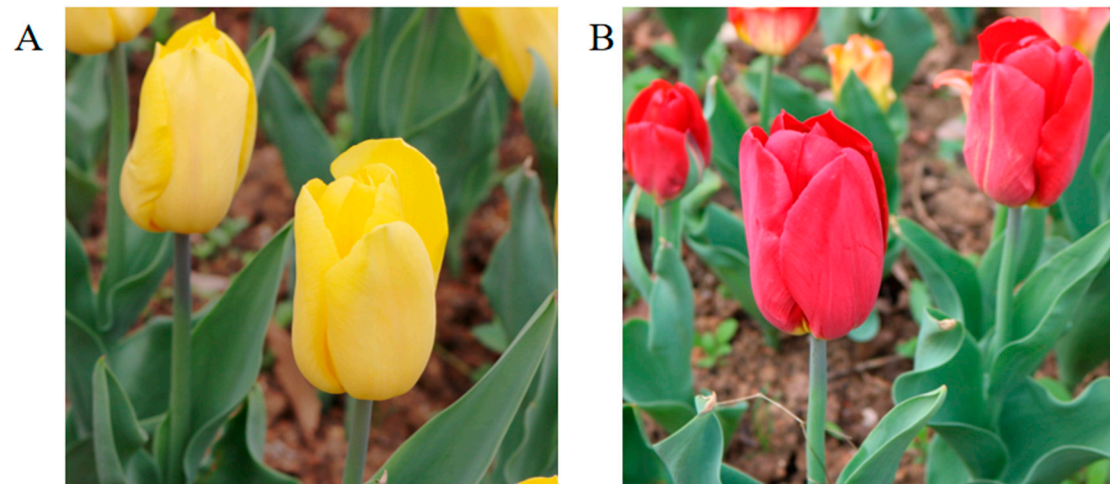

**Figure S1.** The henotypes of yellow petal cultivars 'Strong Golden' (A) and its budding cultivars 'Strong Fire' (B).

**Table S1. The sequence of primers used in this study.**

| Primer                      | Sequence 5'-3'                                        | Experiment                  |
|-----------------------------|-------------------------------------------------------|-----------------------------|
| TgUBQ10-F                   | GTCGCACGTTGGCTGATTAC                                  | RT-qPCR                     |
| TgUBQ10-R                   | GGGCTTAAAGACCACCACGA                                  |                             |
| TgMYB4-F                    | GGAGCGAGGAGAAGACGATG                                  |                             |
| TgMYB4-R                    | GTCCAACACTCCACTGCCAT                                  |                             |
| NtEF1 $\alpha$ -F           | TGGTTGTGACTTTTGGTCCCA                                 |                             |
| NtEF1 $\alpha$ -R           | ACAAACCCACGCTTGAGATCC                                 |                             |
| NtCHS-F                     | AAGCAAGAGAAACTAAAGGCTACAAG                            |                             |
| NtCHS-R                     | AAATCCAAAAAGCACACCCCAT                                |                             |
| NtCHI-F                     | CGGGTGCCTCCATTCTTTTACT                                |                             |
| NtCHI-R                     | CCTGACACTCTTTCGGCGATACTAC                             |                             |
| NtF3H-F                     | CCAGACAAACCAGATGGATGGATAG                             |                             |
| NtF3H-R                     | CAAGGGTAAGGTCGGGCTGTG                                 |                             |
| NtF3'H-F                    | TGGCTATTTTCATTCCAAAAGGCTCA                            |                             |
| NtF3'H-R                    | CTTCAAAGTCATTTCCTCGCACATC                             |                             |
| NtFLS-F                     | CTTGAAGGGAAAAGGGGTGG                                  |                             |
| NtFLS-R                     | CGCAACTTCTCGCAGCCTCT                                  |                             |
| NtDFR-F                     | GCAGTTGCTTCCCTTTTCTACC                                |                             |
| NtDFR-R                     | TTCCCCATTGGTTGACTTTCC                                 |                             |
| NtANS-F                     | GTGCCTGGGTACAACCTTTCTATG                              |                             |
| NtANS-R                     | CATTGCTTAGGATTTCAGGGGTGTC                             |                             |
| TgMYB4-F                    | ATGGGAAGGTCTCCATGCTG                                  | Gene cloning                |
| TgMYB4-R                    | TTCCATTTCAACTGTTCTATAGTCC                             |                             |
| p101YFP-TgMYB4-F            | CATATGGGATCTACTAGTGAATTCATGGGAAGGTCTCC<br>ATGCTGTGAGA | Subcellular<br>localization |
| p101YFP-TgMYB4-R            | CCCGGGGTACCGTCGACGGATCCCTTTTCCATTTCAA<br>CTGTTCTATAGT |                             |
| pCAMBIA2300s-<br>TgMYB4-F   | AGCTTTCGCGAGCTCGGTACCATGGGAAGGTCTCCATG<br>CTGTGAGA    | Plant<br>transformation     |
| pCAMBIA2300s-<br>TgMYB4-R   | TGCCTGCAGGTCGACTCTAGACTTTTCCATTTCAACTG<br>TTCTATAGT   |                             |
| pGreenII 0800-AtDFR-<br>F   | TATAGGGCGAATTGGGTACCTTAAGCTTTTCCAAGATTT<br>ATA        | LUC                         |
| pGreenII 0800-AtDFR-<br>R   | GAAGTAGTGGATCCCCGGGTTTTGTGGTTATATGATAG<br>ATT         |                             |
| pGreenII 0800-TfANS-<br>F   | TATAGGGCGAATTGGGTACCTCTCATCCGTGGAGTCAA<br>AC          |                             |
| pGreenII 0800-TfANS-<br>R   | GAAGTAGTGGATCCCCGGGTTTGTGAGTTGAGAGG<br>AAG-3'         |                             |
| pGreenII 62-<br>SK-TgMYB4-F | CGCTCTAGAACTAGTGGATCCATGGGAAGGTCTCCATG<br>CTGTGAGA    |                             |

| Primer                  | Sequence 5'-3'                                        | Experiment   |
|-------------------------|-------------------------------------------------------|--------------|
| pGreenII 62-SK-TgMYB4-R | GATAAGCTTGATATCGAATTCCTTTCCATTTCAACTGTTCTATAGT        | LUC          |
| SK-AtPAP1-F             | CGCTCTAGAACTAGTGGATCC ATGGAGGGTTCGTCCAAAGG            |              |
| SK-AtPAP1-R             | GATAAGCTTGATATCGAATTC ATCAAATTTACAGTCTCTC             |              |
| SK-TgBHLH42-1-F         | CGCTCTAGAACTAGTGGATCC ATGGCCGCACCGCAGAG               |              |
| SK-TgBHLH42-1-R         | GATAAGCTTGATATCGAATTC GCATAGAGAGTACTGGG               |              |
| pGADT7-TgMYB4-F         | GCCATGGAGGCCAGTGAATTCATGGGAAGGTCTCCATGCTGT            | Yeast assays |
| pGADT7-TgMYB4-R         | ATTCATCTGCAGCTCGAGCTCTCATTCCATTTCAACTGTTCTATAGTC<br>C |              |
| pHIS-TfANS-F            | ACTCACTATAGGGCGAATTCTCTCATCCGTGGAGTCA                 |              |
| pHIS-TfANS-R            | TAATGCCAGGAATTACTAGTTGTTGTGAGTTGAGAGG                 |              |
| pHIS-AtDFR-F            | ACTCACTATAGGGCGAATTCTTAAAGCTTTTCCAAGAT                |              |
| pHIS-AtDFR-R            | TAATGCCAGGAATTACTAGTTTTTGTGGTTATATGATA                |              |
| pGBKT7-TgMYB4-F         | ATGGCCATGGAGGCCGAATTCATGGGAAGGTCTCCATGCTGT            |              |
| pGBKT7-TgMYB4-R         | CTAGTTATGCGCCGCTGCAGTCATTCCATTTCAACTGTTCTATAGT<br>CC  |              |
| AD-TgBHLH42-1F          | GCCATGGAGGCCAGTGAATTCATGGCCGCACCGCAGAGCAG             |              |
| AD-TgBHLH42-1R          | CAGCTCGAGCTCGATGGATCCTTAGCATAGAGAGTACTGGG             |              |
| nLUC-bHLH2F             | ACGGGGGACGAGCTCGGTACCATGGCCGCACCGCAGAG                | BiLC         |
| nLUC-bHLH2R             | CGCGTACGAGATCTGGTCGAC GCATAGAGAGTACTGG                |              |
| cLuc-TgMYB4-F           | TACGCGTCCCGGGGCGGTACCATGGGAAGGTCTCCATGCTGTGAGA        |              |
| cLuc-TgMYB4-R           | ACGAAAGCTCTGCAGGTCGACCTTTTCCATTTCAACTGTTCTATAGT       |              |
| TRV1-F                  | ATTGAGGCGAAGTACGATGG                                  | VIGS         |
| TRV1-R                  | CCATCCACAATTATTTTCCGC                                 |              |
| TRV2-F                  | ATTCATGGGAGATGATACGCT                                 |              |
| TRV2-R                  | AGTCGGCCAAACGCCGATCTCA                                |              |
| TRV2-TgMYB4-F           | AGTAAGGTTACCGAATTCTCTAGAAAGAACTACTGGAACACTCA          |              |
| TRV2-TgMYB4-R           | CCGGGCCTCGAGACGCGTGAGCTCCTTTTCCATTTCAACTGTTCTAT       |              |
